# Supplementary material for: Improved rate ability of low cost sulfur cathodes by using ultrathin graphite sheets with self-wrapped function as cheap conductive agent
Source: Royal Society of Chemistry journal article supplement (doi:10.1039/c4ta06097k), 2015-01-01
Supplement: c4ta06097k1.pdf [file c4ta06097k1.pdf]

## Supporting information

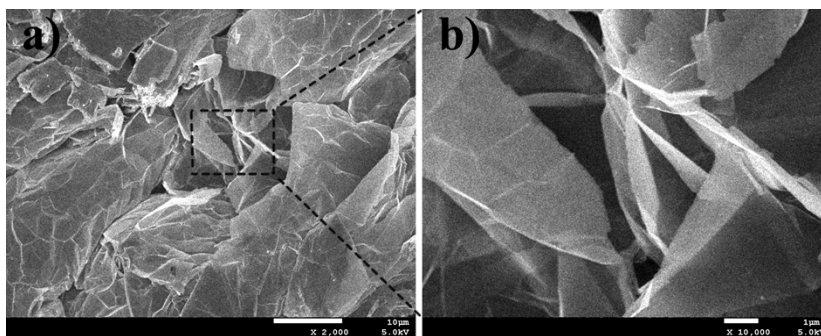

Fig. S1 Morphology of the untreated expanded graphite.

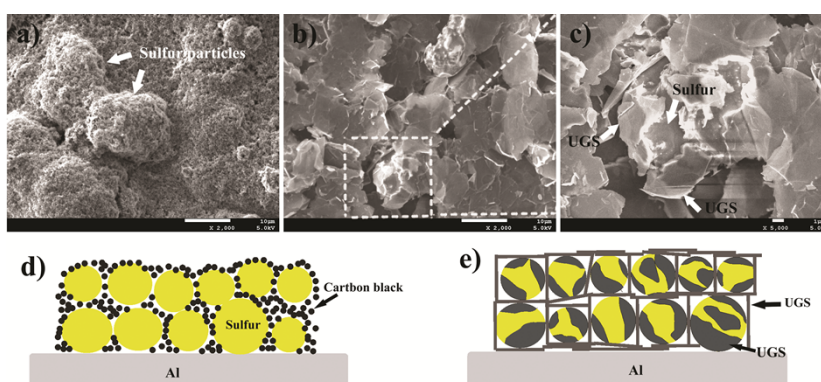

Fig. S2 Morphology and schematic illustration of the pristine sulfur cathodes with carbon black (a, d) and UGS (b, c, e).

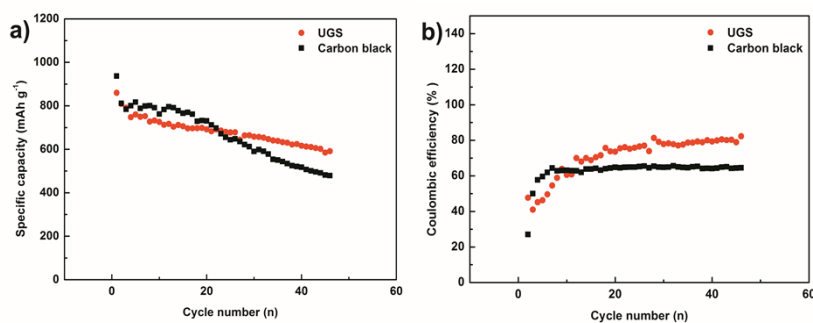

Fig. S3 The Cycle performances (a) and coulombic efficiencies (b) of the sulfur cathodes with UGS and carbon black at 0.2 C.

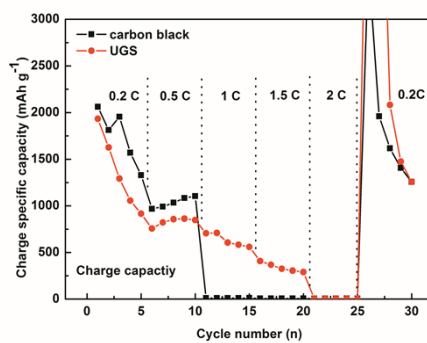

Fig. S4 The charge capacities of the sulfur cathodes charged at various rates and discharged at 0.2 C.

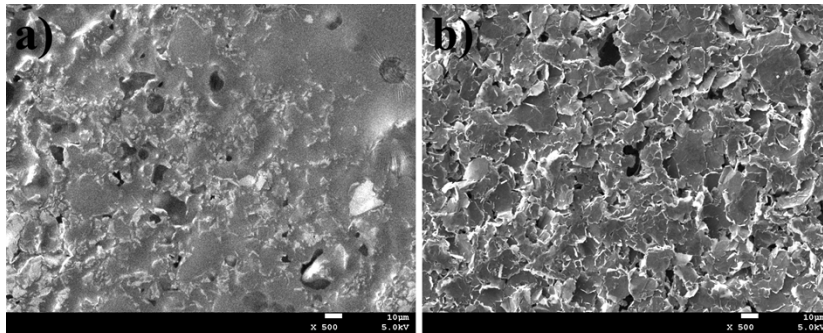

Fig. S5 Morphology of the sulfur/UGS cathode after 1<sup>st</sup> discharge (a) and 1<sup>st</sup> charge (b).

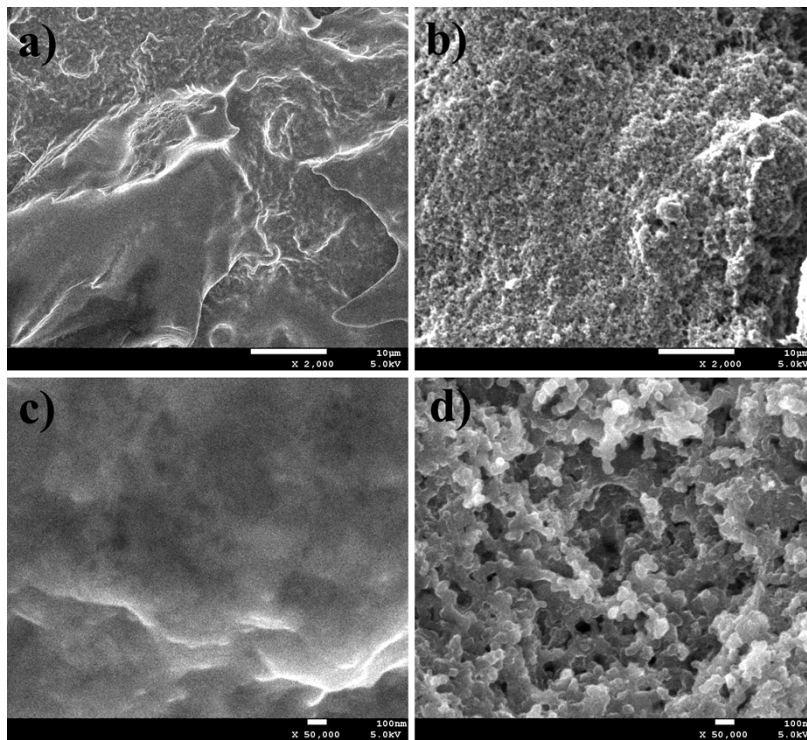

Fig. S6 Morphology of the sulfur/carbon black cathode after 1<sup>st</sup> discharge (a, c) and 1<sup>st</sup> charge (b, d).
